# Supplementary material for: Discrete taxa of saprotrophic fungi respire different ages of carbon from Antarctic soils
Source: PubMed Central journal article supplement (PMC5959846; doi:10.1038/s41598-018-25877-9), 2018-05-18
Supplement: 41598_2018_25877_MOESM1_ESM.pdf [file 41598_2018_25877_MOESM1_ESM.pdf]

## Supplementary materials

### Discrete taxa of saprotrophic fungi respire different ages of carbon from Antarctic soils

Kevin K. Newsham, Mark H. Garnett, Clare H. Robinson & Filipa Cox

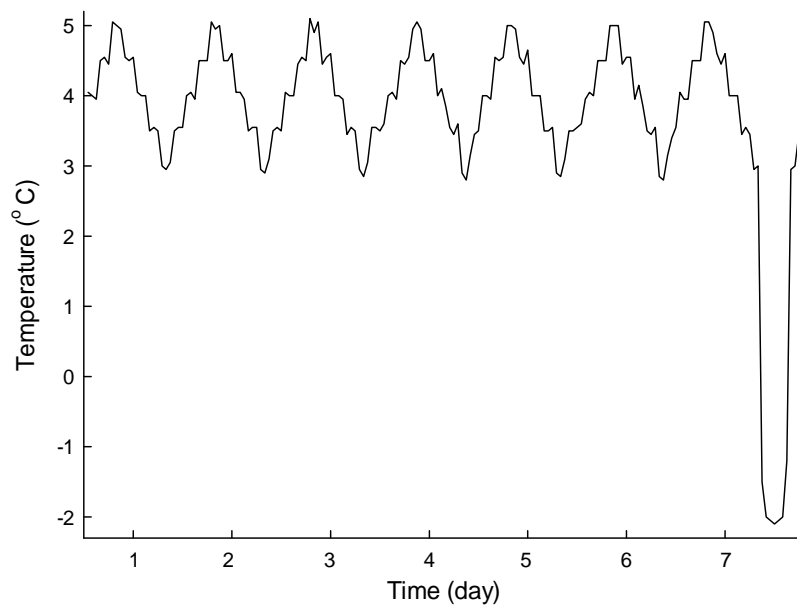

**Supplementary Figure S1.** Temperatures, recorded hourly with data loggers (Tinytag Plus 2, TGP 4017, Gemini data Loggers, Chichester, UK), to which the soils were exposed.

**Supplementary Table S1.**  $^{14}\text{C}$  enrichment, radiocarbon age and  $\delta^{13}\text{C}_{\text{VPDB}}$  of  $\text{CO}_2$  sampled from microcosms.

| Island | Fungal taxon                   | Radiocarbon publication code | $^{14}\text{C}$ enrichment (%Modern $\pm 1\sigma$ ) | Conventional radiocarbon age (years BP $\pm 1\sigma$ ) | $\delta^{13}\text{C}_{\text{VPDB}}$ ( $\% \pm 0.1$ ) |
|--------|--------------------------------|------------------------------|-----------------------------------------------------|--------------------------------------------------------|------------------------------------------------------|
| Signy  | <i>Helotiales</i> sp. 1        | SUERC-63963                  | 93.39 $\pm$ 0.43                                    | 549 $\pm$ 37                                           | -21.9                                                |
| Signy  | <i>Helotiales</i> sp. 1        | SUERC-63955                  | 92.17 $\pm$ 0.43                                    | 655 $\pm$ 37                                           | -22.0                                                |
| Signy  | <i>Helotiales</i> sp. 1        | SUERC-63966                  | 93.60 $\pm$ 0.43                                    | 531 $\pm$ 37                                           | -21.3                                                |
| Signy  | <i>M. turficola</i>            | SUERC-63960                  | 96.36 $\pm$ 0.44                                    | 298 $\pm$ 37                                           | -22.8                                                |
| Signy  | <i>M. turficola</i>            | SUERC-63962                  | 96.46 $\pm$ 0.44                                    | 289 $\pm$ 37                                           | -22.8                                                |
| Signy  | <i>M. turficola</i>            | SUERC-63944                  | 97.89 $\pm$ 0.45                                    | 171 $\pm$ 37                                           | -21.1                                                |
| Signy  | <i>M. turficola</i>            | SUERC-63971                  | 98.18 $\pm$ 0.45                                    | 148 $\pm$ 37                                           | -21.1                                                |
| Signy  | <i>Pseudogymnoascus roseus</i> | SUERC-63953                  | 97.68 $\pm$ 0.45                                    | 189 $\pm$ 37                                           | -23.8                                                |
| Signy  | <i>P. roseus</i>               | SUERC-63965                  | 98.35 $\pm$ 0.45                                    | 134 $\pm$ 37                                           | -23.7                                                |
| Signy  | <i>P. roseus</i>               | SUERC-63954                  | 97.54 $\pm$ 0.45                                    | 200 $\pm$ 37                                           | -23.5                                                |
| Léonie | <i>Helotiales</i> sp. 1        | SUERC-63951                  | 86.43 $\pm$ 0.40                                    | 1171 $\pm$ 38                                          | -22.6                                                |
| Léonie | <i>Helotiales</i> sp. 1        | SUERC-63943                  | 87.82 $\pm$ 0.41                                    | 1043 $\pm$ 37                                          | -23.0                                                |
| Léonie | <i>Helotiales</i> sp. 1        | SUERC-63950                  | 90.27 $\pm$ 0.42                                    | 822 $\pm$ 37                                           | -21.6                                                |
| Léonie | <i>Rhizoscyphus</i> sp.        | SUERC-63970                  | 92.83 $\pm$ 0.43                                    | 597 $\pm$ 37                                           | -23.3                                                |
| Léonie | <i>Rhizoscyphus</i> sp.        | SUERC-63952                  | 92.46 $\pm$ 0.43                                    | 629 $\pm$ 37                                           | -23.0                                                |
| Léonie | <i>Rhizoscyphus</i> sp.        | SUERC-63946                  | 92.86 $\pm$ 0.43                                    | 595 $\pm$ 37                                           | -23.5                                                |
| Léonie | <i>Mortierella turficola</i>   | SUERC-63961                  | 91.89 $\pm$ 0.42                                    | 679 $\pm$ 37                                           | -24.1                                                |
| Léonie | <i>M. turficola</i>            | SUERC-63964                  | 92.82 $\pm$ 0.41                                    | 599 $\pm$ 35                                           | -24.8                                                |
| Léonie | <i>M. turficola</i>            | SUERC-63945                  | 90.67 $\pm$ 0.42                                    | 786 $\pm$ 37                                           | -24.5                                                |
| Léonie | <i>M. turficola</i>            | SUERC-63956                  | 93.29 $\pm$ 0.43                                    | 558 $\pm$ 37                                           | -23.3                                                |
